# Supplementary material for: Clinical Evaluation of the Torq Zero Delay Centrifuge System for Decentralized Blood Collection and Stabilization
Source: MDPI journal article supplement (doi:10.3390/diagnostics11061019), 2021-06-02
Supplement: s1 [file s1]

**Table S1. A summary of subject demographic statistics**

| Demographic Parameters |                                    | Sample size (n) | Percent (%) |
|------------------------|------------------------------------|-----------------|-------------|
| Age                    | Mean +/- SD                        | 50.76 +/- 16.25 | N/A         |
|                        | Median                             | 54.50           | N/A         |
|                        | Min                                | 18              | N/A         |
|                        | Max                                | 79              | N/A         |
| Gender                 | Male                               | 27              | 20.15       |
|                        | Female                             | 105             | 78.36       |
|                        | Declined to answer                 | 2               | 1.49        |
| Race                   | White                              | 93              | 69.40       |
|                        | Hispanic or Latino                 | 20              | 14.93       |
|                        | Black or African American          | 15              | 11.19       |
|                        | Native American or American Indian | 0               | 0.00        |
|                        | Asian or Pacific Islander          | 1               | 0.75        |
|                        | Others                             | 5               | 3.73        |
| Total                  |                                    | 134             | N/A         |

**Table S2.** Extreme MDLs used for mean percent bias analysis tested with common pathophysiology associated with extreme MDL values.

| Analyte | Extreme MDL       | Common Pathophysiology of Extreme MDL                                                                                    |
|---------|-------------------|--------------------------------------------------------------------------------------------------------------------------|
| K       | $\geq 7$ mmol/L   | Severe hyperkalemia in the case of renal failure or blood transfusion                                                    |
| Na      | $\leq 115$ mmol/L | Severe hyponatremia in the case of burns or hypotonic IV use                                                             |
| AST     | $\geq 300$ U/L    | Infectious hepatitis, primary or metastatic carcinoma of the liver and other inflammatory conditions affecting the liver |
| ALT     | $\geq 250$ U/L    | Infectious hepatitis, primary or metastatic carcinoma of the liver and other inflammatory conditions affecting the liver |
| ALP     | $\geq 300$ U/L    | Extra/intrahepatic obstruction (e.g. by stone or cancer)                                                                 |

**Table S3.** A summary of performance comparison results for potassium (K)

| Site | Sample Size (n) | Analyzer | Slope (95% CI) | Intercept (95% CI) | Pearson's coefficient | Mean % Bias |
|------|-----------------|----------|----------------|--------------------|-----------------------|-------------|
|------|-----------------|----------|----------------|--------------------|-----------------------|-------------|

|                |    |                 |                          |                            |       |        |
|----------------|----|-----------------|--------------------------|----------------------------|-------|--------|
| Site 1         | 47 | Analyzer 1      | 1.025<br>(0.960 – 1.163) | -0.075<br>(-0.614 - 0.195) | 0.954 | -0.648 |
|                | 47 | Analyzer 2      | 1.062<br>(0.981 - 1.273) | -0.181<br>(-1.061 - 0.147) | 0.940 | -1.866 |
|                | 94 | Analyzer Pooled | 1.047<br>(0.992 – 1.162) | -0.145<br>(-0.618 – 0.086) | 0.946 | -1.257 |
| Site 2         | 48 | Analyzer 1      | 0.960<br>(0.846 - 1.053) | 0.170<br>(-0.199 - 0.612)  | 0.929 | -0.339 |
|                | 48 | Analyzer 2      | 0.956<br>(0.870 - 1.112) | 0.211<br>(-0.407 - 0.547)  | 0.924 | -0.870 |
|                | 96 | Analyzer Pooled | 0.963<br>(0.894 – 1.046) | 0.170<br>(-0.169 – 0.435)  | 0.927 | -0.604 |
| Site 3         | 39 | Analyzer 1      | 0.993<br>(0.870 - 1.142) | 0.096<br>(-0.509 - 0.587)  | 0.910 | -1.748 |
|                | 39 | Analyzer 2      | 0.929<br>(0.811 - 1.071) | 0.316<br>(-0.241 - 0.798)  | 0.909 | -0.728 |
|                | 78 | Analyzer Pooled | 0.949<br>(0.864 – 1.050) | 0.254<br>(-0.150 – 0.598)  | 0.908 | -1.238 |
| Pooled (n=134) |    |                 | 1.027<br>(0.982 - 1.102) | -0.069<br>(-0.355 - 0.111) | 0.944 | -1.018 |

**Table S4.** A summary of performance comparison results for sodium (Na)

| Site   | Sample Size (n) | Analyzer        | Slope<br>(95% CI)        | Intercept<br>(95% CI)       | Pearson's coefficient | Mean % Bias |
|--------|-----------------|-----------------|--------------------------|-----------------------------|-----------------------|-------------|
| Site 1 | 47              | Analyzer 1      | 0.881<br>(0.739 – 0.949) | 14.971<br>(5.892 – 35.446)  | 0.946                 | 1.264       |
|        | 47              | Analyzer 2      | 0.984<br>(0.923 – 1.046) | 2.290<br>(-6.298 – 10.864)  | 0.981                 | -0.082      |
|        | 94              | Analyzer Pooled | 0.916<br>(0.842 – 0.963) | 10.975<br>(4.384 – 21.169)  | 0.956                 | 0.591       |
| Site 2 | 48              | Analyzer 1      | 0.606<br>(0.441 – 0.854) | 54.527<br>(19.674 – 77.674) | 0.835                 | 0.449       |
|        | 48              | Analyzer 2      | 0.984                    | 1.919                       | 0.859                 | 0.206       |

|               |                       |                        |                          |                               |       |       |
|---------------|-----------------------|------------------------|--------------------------|-------------------------------|-------|-------|
|               |                       |                        | (0.837 - 1.147)          | (-21.100 – 22.980)            |       |       |
|               | <b>96</b>             | <b>Analyzer Pooled</b> | 0.799<br>(0.651 – 0.976) | 27.824<br>(2.932 – 48.503)    | 0.837 | 0.328 |
|               | <b>39</b>             | <b>Analyzer 1</b>      | 1.083<br>(0.902 - 1.286) | -11.599<br>(-39.832 – 13.630) | 0.898 | 0.002 |
| <b>Site 3</b> | <b>39</b>             | <b>Analyzer 2</b>      | 0.925<br>(0.738 – 1.112) | 10.169<br>(-15.819 – 36.126)  | 0.844 | 0.256 |
|               | <b>78</b>             | <b>Analyzer Pooled</b> | 1.015<br>(0.891 – 1.149) | -2.324<br>(-20.934 – 15.017)  | 0.869 | 0.129 |
|               | <b>Pooled (n=134)</b> |                        | 0.911<br>(0.840 – 0.960) | 11.934<br>(5.226 – 21.825)    | 0.937 | 0.362 |

**Table S5.** A summary of performance comparison results for chloride (Cl)

| Site          | Sample Size (n) | Analyzer               | Slope<br>(95% CI)        | Intercept<br>(95% CI)       | Pearson's coefficient | Mean % Bias |
|---------------|-----------------|------------------------|--------------------------|-----------------------------|-----------------------|-------------|
|               | <b>47</b>       | <b>Analyzer 1</b>      | 0.944<br>(0.838 – 1.006) | 4.848<br>(-1.512 – 15.437)  | 0.970                 | 0.991       |
| <b>Site 1</b> | <b>47</b>       | <b>Analyzer 2</b>      | 0.993<br>(0.947 – 1.045) | 1.081<br>(-4.159 – 5.873)   | 0.986                 | -0.379      |
|               | <b>94</b>       | <b>Analyzer Pooled</b> | 0.957<br>(0.902 – 0.996) | 4.117<br>(0.348 – 9.696)    | 0.975                 | 0.306       |
|               | <b>48</b>       | <b>Analyzer 1</b>      | 0.896<br>(0.783 – 1.019) | 10.322<br>(-2.514 – 22.123) | 0.881                 | 0.477       |
| <b>Site 2</b> | <b>48</b>       | <b>Analyzer 2</b>      | 0.974<br>(0.856 – 1.124) | 2.408<br>(-13.141 – 14.750) | 0.906                 | 0.320       |
|               | <b>96</b>       | <b>Analyzer Pooled</b> | 0.937<br>(0.854 – 1.029) | 6.110<br>(-3.310 – 14.654)  | 0.893                 | 0.399       |
|               | <b>39</b>       | <b>Analyzer 1</b>      | 1.027<br>(0.946 – 1.125) | -2.982<br>(-13.217 – 5.495) | 0.948                 | 0.175       |
| <b>Site 3</b> | <b>39</b>       | <b>Analyzer 2</b>      | 0.977<br>(0.786 – 1.123) | 1.869<br>(-12.927 – 21.573) | 0.889                 | 0.451       |
|               | <b>78</b>       | <b>Analyzer Pooled</b> | 1.017<br>(0.930 – 1.096) | -2.020<br>(-10.167 – 6.832) | 0.920                 | 0.313       |

|                       |                          |                          |       |       |
|-----------------------|--------------------------|--------------------------|-------|-------|
| <b>Pooled (n=134)</b> | 0.959<br>(0.913 – 0.992) | 3.869<br>(0.565 – 8.567) | 0.964 | 0.341 |
|-----------------------|--------------------------|--------------------------|-------|-------|

**Table S6.** A summary of performance comparison results for calcium (Ca)

| Site                  | Sample Size (n) | Analyzer        | Slope<br>(95% CI)        | Intercept<br>(95% CI)      | Pearson's<br>coefficient | Mean<br>% Bias |
|-----------------------|-----------------|-----------------|--------------------------|----------------------------|--------------------------|----------------|
| Site 1                | 44              | Analyzer 1      | 0.931<br>(0.866 - 1.005) | 0.508<br>(-0.165 – 1.094)  | 0.962                    | 1.445          |
|                       | 44              | Analyzer 2      | 1.007<br>(0.960 - 1.082) | -0.024<br>(-0.731 – 0.404) | 0.986                    | -0.445         |
|                       | 88              | Analyzer Pooled | 0.958<br>(0.914 – 1.001) | 0.338<br>(-0.026 – 0.721)  | 0.966                    | 0.500          |
| Site 2                | 45              | Analyzer 1      | 0.963<br>(0.823 – 1.147) | 0.248<br>(-1.455 – 1.562)  | 0.871                    | 0.957          |
|                       | 45              | Analyzer 2      | 0.955<br>(0.869 - 1.031) | 0.415<br>(-0.296 – 1.243)  | 0.945                    | 0.042          |
|                       | 90              | Analyzer Pooled | 0.995<br>(0.896 – 1.096) | 0.001<br>(-0.951– 0.926)   | 0.903                    | 0.499          |
| Site 3                | 38              | Analyzer 1      | 0.880<br>(0.759 – 0.980) | 1.174<br>(0.249 – 2.296)   | 0.922                    | -0.406         |
|                       | 38              | Analyzer 2      | 1.116<br>(0.966 – 1.243) | -1.070<br>(-2.263 – 0.342) | 0.917                    | -0.241         |
|                       | 76              | Analyzer Pooled | 0.978<br>(0.880 – 1.072) | 0.234<br>(-0.647 – 1.151)  | 0.914                    | -0.323         |
| <b>Pooled (n=127)</b> |                 |                 | 0.974<br>(0.935 – 1.010) | 0.218<br>(-0.118 – 0.573)  | 0.951                    | 0.257          |

**Table S7.** A summary of performance comparison results for Aspartate Aminotransferase (AST)

| Site   | Sample Size (n) | Analyzer   | Slope<br>(95% CI) | Intercept<br>(95% CI) | Pearson's<br>coefficient | Mean<br>% Bias |
|--------|-----------------|------------|-------------------|-----------------------|--------------------------|----------------|
| Site 1 | 47              | Analyzer 1 | 1.009             | -0.179                | 0.999                    | -0.386         |

|               |                       |                        |                          |                            |       |        |
|---------------|-----------------------|------------------------|--------------------------|----------------------------|-------|--------|
|               |                       |                        | (0.868 - 1.030)          | (-0.745 – 2.356)           |       |        |
|               | <b>47</b>             | <b>Analyzer 2</b>      | 1.002<br>(0.972 - 1.044) | 0.027<br>(-0.844 – 0.680)  | 1.000 | -0.387 |
|               | <b>94</b>             | <b>Analyzer Pooled</b> | 1.005<br>(0.977 – 1.023) | -0.066<br>(-0.462 – 0.462) | 1.000 | -0.387 |
| <b>Site 2</b> | <b>48</b>             | <b>Analyzer 1</b>      | 0.942<br>(0.869 – 0.974) | 1.354<br>(0.463 – 2.730)   | 0.965 | -1.286 |
|               | <b>48</b>             | <b>Analyzer 2</b>      | 0.979<br>(0.887 - 1.016) | 0.800<br>(-0.358 – 2.806)  | 0.962 | -1.582 |
|               | <b>96</b>             | <b>Analyzer Pooled</b> | 0.965<br>(0.909 – 0.993) | 0.998<br>(0.212 – 2.179)   | 0.965 | -1.434 |
| <b>Site 3</b> | <b>38</b>             | <b>Analyzer 1</b>      | 0.992<br>(0.980 - 1.121) | 0.964<br>(-1.114 – 1.511)  | 0.996 | -4.234 |
|               | <b>38</b>             | <b>Analyzer 2</b>      | 0.994<br>(0.982 - 1.065) | 0.849<br>(-0.746 – 1.374)  | 0.998 | -3.182 |
|               | <b>76</b>             | <b>Analyzer Pooled</b> | 0.993<br>(0.984 – 1.052) | 0.908<br>(-0.250 – 1.254)  | 0.997 | -3.708 |
|               | <b>Pooled (n=133)</b> |                        | 1.003<br>(0.982 – 1.018) | 0.236<br>(-0.140 – 0.726)  | 0.999 | -1.714 |

**Table S8.** A summary of performance comparison results for Alanine Aminotransferase (ALT)

| <b>Site</b>   | <b>Sample Size (n)</b> | <b>Analyzer</b>        | <b>Slope (95% CI)</b>    | <b>Intercept (95% CI)</b>   | <b>Pearson's coefficient</b> | <b>Mean % Bias</b> |
|---------------|------------------------|------------------------|--------------------------|-----------------------------|------------------------------|--------------------|
| <b>Site 1</b> | <b>46</b>              | <b>Analyzer 1</b>      | 0.997<br>(0.968 – 0.998) | -0.437<br>(-0.629 – -0.034) | 1.000                        | 3.870              |
|               | <b>46</b>              | <b>Analyzer 2</b>      | 0.987<br>(0.977 - 1.063) | 0.424<br>(-0.742 – 1.032)   | 0.999                        | -1.811             |
|               | <b>92</b>              | <b>Analyzer Pooled</b> | 0.992<br>(0.982 – 1.001) | 0.002<br>(-0.423 – 0.365)   | 0.999                        | 1.029              |
| <b>Site 2</b> | <b>48</b>              | <b>Analyzer 1</b>      | 0.975<br>(0.930 – 1.016) | -0.241<br>(-0.821 – 0.347)  | 0.991                        | 4.356              |
|               | <b>48</b>              | <b>Analyzer 2</b>      | 1.002<br>(0.972 - 1.037) | -0.294<br>(-0.777 – 0.097)  | 0.995                        | 2.444              |

|               |                       |                        |                          |                            |       |        |
|---------------|-----------------------|------------------------|--------------------------|----------------------------|-------|--------|
|               | <b>96</b>             | <b>Analyzer Pooled</b> | 0.985<br>(0.957 – 1.013) | -0.229<br>(-0.599 – 0.136) | 0.992 | 3.400  |
|               | <b>36</b>             | <b>Analyzer 1</b>      | 0.876<br>(0.823 – 0.967) | 0.887<br>(-0.215 – 1.500)  | 0.994 | 4.875  |
| <b>Site 3</b> | <b>36</b>             | <b>Analyzer 2</b>      | 0.918<br>(0.771 – 0.971) | 0.769<br>(0.097 – 2.313)   | 0.982 | -0.180 |
|               | <b>72</b>             | <b>Analyzer Pooled</b> | 0.896<br>(0.834 – 0.959) | 0.839<br>(0.125 – 1.559)   | 0.987 | 2.348  |
|               | <b>Pooled (n=130)</b> |                        | 0.987<br>(0.967 – 0.996) | -0.197<br>(-0.400 – 0.107) | 0.998 | 2.270  |

**Table S9.** A summary of performance comparison results for Alkaline Phosphatase (ALP)

| <b>Site</b>   | <b>Sample Size (n)</b> | <b>Analyzer</b>        | <b>Slope (95% CI)</b>    | <b>Intercept (95% CI)</b>  | <b>Pearson's coefficient</b> | <b>Mean % Bias</b> |
|---------------|------------------------|------------------------|--------------------------|----------------------------|------------------------------|--------------------|
|               | <b>47</b>              | <b>Analyzer 1</b>      | 0.983<br>(0.948 - 1.008) | -0.850<br>(-3.020 – 1.701) | 0.999                        | 2.783              |
| <b>Site 1</b> | <b>47</b>              | <b>Analyzer 2</b>      | 0.993<br>(0.970 - 1.004) | 0.074<br>(-0.865 – 1.848)  | 1.000                        | 0.517              |
|               | <b>94</b>              | <b>Analyzer Pooled</b> | 0.988<br>(0.975 – 1.003) | -0.320<br>(-1.722 – 0.804) | 0.999                        | 1.650              |
|               | <b>48</b>              | <b>Analyzer 1</b>      | 0.963<br>(0.935 – 1.015) | 1.096<br>(-2.387 – 3.193)  | 0.995                        | 2.195              |
| <b>Site 2</b> | <b>48</b>              | <b>Analyzer 2</b>      | 0.994<br>(0.980 - 1.020) | -0.059<br>(-1.741 – 0.899) | 0.999                        | 0.752              |
|               | <b>96</b>              | <b>Analyzer Pooled</b> | 0.982<br>(0.957 – 1.010) | 0.331<br>(-1.667 – 2.031)  | 0.996                        | 1.474              |
|               | <b>39</b>              | <b>Analyzer 1</b>      | 0.994<br>(0.961 - 1.021) | 0.332<br>(-1.442 – 2.491)  | 0.997                        | 0.147              |
| <b>Site 3</b> | <b>39</b>              | <b>Analyzer 2</b>      | 0.966<br>(0.928 – 0.998) | 1.954<br>(-0.190 – 4.505)  | 0.996                        | 0.501              |
|               | <b>78</b>              | <b>Analyzer Pooled</b> | 0.978<br>(0.951 – 1.000) | 1.259<br>(-0.248 – 3.039)  | 0.996                        | 0.324              |
|               | <b>Pooled (N=134)</b>  |                        | 0.984                    | 0.299                      | 0.998                        | 1.201              |

(0.974 – 0.995)    (-0.529 – 1.018)

**Table S10.** A summary of performance comparison results for total bilirubin (T.Bili)

| Site           | Sample Size (n) | Analyzer        | Slope<br>(95% CI)        | Intercept<br>(95% CI)      | Pearson's coefficient | Mean % Bias |
|----------------|-----------------|-----------------|--------------------------|----------------------------|-----------------------|-------------|
| Site 1         | 45              | Analyzer 1      | 1.045<br>(0.940 – 1.089) | -0.015<br>(-0.053 - 0.014) | 0.946                 | 2.206       |
|                | 45              | Analyzer 2      | 1.027<br>(0.981 - 1.073) | -0.010<br>(-0.024 - 0.007) | 0.988                 | 0.593       |
|                | 90              | Analyzer Pooled | 1.021<br>(0.971 – 1.051) | -0.010<br>(-0.026 – 0.006) | 0.969                 | 1.400       |
| Site 2         | 47              | Analyzer 1      | 0.907<br>(0.823 – 0.991) | 0.022<br>(-0.012 - 0.053)  | 0.971                 | 3.971       |
|                | 47              | Analyzer 2      | 0.993<br>(0.966 - 1.015) | 0.003<br>(-0.008 - 0.015)  | 0.996                 | -0.299      |
|                | 94              | Analyzer Pooled | 0.946<br>(0.892 – 0.992) | 0.013<br>(-0.005 – 0.032)  | 0.983                 | 1.836       |
| Site 3         | 37              | Analyzer 1      | 1.030<br>(0.964 - 1.136) | -0.002<br>(-0.039 - 0.027) | 0.963                 | -2.452      |
|                | 37              | Analyzer 2      | 1.055<br>(1.005 - 1.094) | -0.010<br>(-0.027 - 0.008) | 0.989                 | -2.488      |
|                | 74              | Analyzer Pooled | 1.004<br>(1.000 – 1.093) | -0.006<br>(-0.024 – 0.011) | 0.977                 | -2.470      |
| Pooled (n=129) |                 |                 | 0.978<br>(0.944 - 1.010) | 0.007<br>(-0.005 - 0.018)  | 0.976                 | 0.449       |

**Table S11.** A summary of performance comparison results for albumin (Alb)

| Site           | Sample Size (n) | Analyzer        | Slope (95% CI)           | Intercept (95% CI)         | Pearson's coefficient | Mean % Bias |
|----------------|-----------------|-----------------|--------------------------|----------------------------|-----------------------|-------------|
| Site 1         | 46              | Analyzer 1      | 0.917<br>(0.820 - 1.040) | 0.232<br>(-0.309 - 0.639)  | 0.910                 | 2.878       |
|                | 46              | Analyzer 2      | 0.952<br>(0.883 - 1.038) | 0.152<br>(-0.221 - 0.452)  | 0.961                 | 1.290       |
|                | 92              | Analyzer Pooled | 0.941<br>(0.882 - 1.010) | 0.162<br>(-0.136 - 0.422)  | 0.930                 | 2.084       |
| Site 2         | 48              | Analyzer 1      | 1.021<br>(0.827 - 1.278) | -0.177<br>(-1.230 - 0.634) | 0.821                 | 2.166       |
|                | 48              | Analyzer 2      | 1.025<br>(0.934 - 1.177) | -0.167<br>(-0.823 - 0.225) | 0.948                 | 1.296       |
|                | 96              | Analyzer Pooled | 1.047<br>(0.951 - 1.174) | -0.276<br>(-0.819 - 0.145) | 0.903                 | 1.731       |
| Site 3         | 38              | Analyzer 1      | 0.890<br>(0.776 - 1.006) | 0.420<br>(-0.067 - 0.894)  | 0.899                 | 1.141       |
|                | 38              | Analyzer 2      | 1.000<br>(0.870 - 1.208) | -0.057<br>(-0.988 - 0.528) | 0.905                 | 1.297       |
|                | 76              | Analyzer Pooled | 0.949<br>(0.880 - 1.041) | 0.171<br>(-0.242 - 0.466)  | 0.916                 | 1.219       |
| Pooled (n=132) |                 |                 | 0.978<br>(0.934 - 1.023) | 0.021<br>(-0.179 - 0.214)  | 0.919                 | 1.706       |

**Table S12.** A summary of performance comparison results for total protein (TP)

| Site   | Sample Size (n) | Analyzer        | Slope (95% CI)           | Intercept (95% CI)         | Pearson's coefficient | Mean % Bias |
|--------|-----------------|-----------------|--------------------------|----------------------------|-----------------------|-------------|
| Site 1 | 46              | Analyzer 1      | 0.874<br>(0.774 - 0.951) | 0.760<br>(0.224 - 1.467)   | 0.927                 | 1.979       |
|        | 46              | Analyzer 2      | 1.031<br>(0.966 - 1.101) | -0.264<br>(-0.744 - 0.193) | 0.973                 | 0.541       |
|        | 92              | Analyzer Pooled | 0.962<br>(0.911 - 1.014) | 0.179<br>(-0.179 - 0.526)  | 0.943                 | 1.260       |
| Site 2 | 48              | Analyzer 1      | 0.962                    | 0.180                      | 0.892                 | 1.187       |



|               |                       |                        |                          |                            |       |        |
|---------------|-----------------------|------------------------|--------------------------|----------------------------|-------|--------|
|               |                       |                        | (0.792 – 1.104)          | (-0.789 – 1.363)           |       |        |
|               | <b>48</b>             | <b>Analyzer 2</b>      | 0.996<br>(0.920 - 1.075) | 0.050<br>(-0.520 – 0.585)  | 0.962 | -0.326 |
|               | <b>96</b>             | <b>Analyzer Pooled</b> | 0.999<br>(0.907 – 1.085) | -0.024<br>(-0.634 – 0.613) | 0.923 | 0.431  |
|               | <b>39</b>             | <b>Analyzer 1</b>      | 0.981<br>(0.840 - 1.089) | 0.130<br>(-0.629 – 1.160)  | 0.907 | 0.137  |
| <b>Site 3</b> | <b>39</b>             | <b>Analyzer 2</b>      | 1.123<br>(0.997 – 1.290) | -0.896<br>(-2.162 – 0.057) | 0.913 | -0.249 |
|               | <b>78</b>             | <b>Analyzer Pooled</b> | 1.056<br>(0.964 – 1.141) | -0.407<br>(-1.038 – 0.266) | 0.909 | -0.056 |
|               | <b>Pooled (n=133)</b> |                        | 1,003<br>(0.964 – 1.045) | -0.063<br>(-0.368 – 0.225) | 0.933 | 0.575  |

**Table S13.** A summary of performance comparison results for blood urea nitrogen (BUN)

| Site          | Sample Size (n) | Analyzer               | Slope<br>(95% CI)        | Intercept<br>(95% CI)      | Pearson's coefficient | Mean % Bias |
|---------------|-----------------|------------------------|--------------------------|----------------------------|-----------------------|-------------|
|               | <b>47</b>       | <b>Analyzer 1</b>      | 1.011<br>(0.966 - 1.058) | -0.233<br>(-0.838 – 0.353) | 0.992                 | 0.665       |
| <b>Site 1</b> | <b>47</b>       | <b>Analyzer 2</b>      | 0.999<br>(0.973 - 1.021) | -0.044<br>(-0.379 – 0.301) | 0.995                 | 0.525       |
|               | <b>94</b>       | <b>Analyzer Pooled</b> | 1.005<br>(0.979 – 1.028) | -0.140<br>(-0.460 – 0.189) | 0.994                 | 0.595       |
|               | <b>48</b>       | <b>Analyzer 1</b>      | 0.984<br>(0.959 – 1.016) | 0.317<br>(-0.134 – 0.689)  | 0.995                 | -0.730      |
| <b>Site 2</b> | <b>48</b>       | <b>Analyzer 2</b>      | 0.998<br>(0.985 - 1.012) | 0.008<br>(-0.208 – 0.217)  | 0.997                 | 0.093       |
|               | <b>96</b>       | <b>Analyzer Pooled</b> | 0.991<br>(0.977 – 1.007) | 0.156<br>(-0.080 – 0.389)  | 0.996                 | -0.319      |
|               | <b>39</b>       | <b>Analyzer 1</b>      | 1.032<br>(0.975 - 1.084) | -0.277<br>(-0.998 – 0.501) | 0.991                 | -0.999      |
| <b>Site 3</b> | <b>39</b>       | <b>Analyzer 2</b>      | 0.996<br>(0.964 - 1.032) | 0.033<br>(-0.412 – 0.423)  | 0.996                 | 0.245       |

| Site | Sample Size (n) | Analyzer        | Slope (95% CI)           | Intercept (95% CI)         | Pearson's coefficient | Mean % Bias |
|------|-----------------|-----------------|--------------------------|----------------------------|-----------------------|-------------|
|      | 78              | Analyzer Pooled | 1.015<br>(0.979 – 1.051) | -0.132<br>(-0.577 – 0.315) | 0.993                 | -0.377      |
|      | Pooled (n=134)  |                 | 1.001<br>(0.990 – 1.016) | -0.014<br>(-0.209 – 0.152) | 0.995                 | -0.015      |

**Table S14.** A summary of performance comparison results for creatinine (Cre)

| Site   | Sample Size (n) | Analyzer        | Slope (95% CI)           | Intercept (95% CI)         | Pearson's coefficient | Mean % Bias |
|--------|-----------------|-----------------|--------------------------|----------------------------|-----------------------|-------------|
| Site 1 | 46              | Analyzer 1      | 0.939<br>(0.905 – 0.977) | 0.030<br>(0.001 – 0.055)   | 0.989                 | 1.875       |
|        | 46              | Analyzer 2      | 0.980<br>(0.919 - 1.047) | 0.001<br>(-0.046 – 0.043)  | 0.988                 | 1.808       |
|        | 92              | Analyzer Pooled | 0.960<br>(0.926 – 1.001) | 0.014<br>(-0.012 – 0.039)  | 0.988                 | 1.841       |
| Site 2 | 48              | Analyzer 1      | 0.973<br>(0.953 – 1.008) | 0.007<br>(-0.026 – 0.027)  | 0.994                 | 1.929       |
|        | 48              | Analyzer 2      | 0.997<br>(0.956 - 1.026) | -0.012<br>(-0.035 – 0.019) | 0.997                 | 1.821       |
|        | 96              | Analyzer Pooled | 0.985<br>(0.961 – 1.011) | -0.003<br>(-0.024 – 0.017) | 0.995                 | 1.875       |
| Site 3 | 39              | Analyzer 1      | 0.993<br>(0.923 – 1.051) | -0.001<br>(-0.046 – 0.053) | 0.984                 | 0.787       |
|        | 39              | Analyzer 2      | 1.011<br>(0.941 – 1.080) | -0.019<br>(-0.073 – 0.033) | 0.981                 | 1.504       |
|        | 78              | Analyzer Pooled | 0.969<br>(0.949 – 0.991) | 0.012<br>(-0.005 – 0.027)  | 0.982                 | 1.146       |
|        | Pooled (n=133)  |                 | 0.982<br>(0.964 – 1.001) | 0.001<br>(-0.012 – 0.015)  | 0.992                 | 1.649       |

**Table S15.** A summary of performance comparison results for cholesterol (Chol)

| Site           | Sample Size (n) | Analyzer   | Slope (95% CI)           | Intercept (95% CI)         | Pearson's coefficient | Mean % Bias |
|----------------|-----------------|------------|--------------------------|----------------------------|-----------------------|-------------|
| Site 1         | 47              | Analyzer 2 | 0.963<br>(0.934 - 1.005) | 5.876<br>(-1.651 – 11.038) | 0.996                 | -0.719      |
| Site 2         | 48              | Analyzer 2 | 0.998<br>(0.983 - 1.010) | -0.365<br>(-2.943 – 2.395) | 0.999                 | -0.401      |
| Site 3         | 39              | Analyzer 2 | 0.999<br>(0.960 – 1.037) | -0.399<br>(-7.485 – 6.518) | 0.994                 | -0.260      |
| Pooled (n=133) |                 |            | 0.988<br>(0.972 – 1.004) | 1.426<br>(-1.336 – 4.287)  | 0.997                 | -0.438      |

**Table S16.** A summary of performance comparison results for triglycerides (TRIG)

| Site           | Sample Size (n) | Analyzer   | Slope (95% CI)           | Intercept (95% CI)          | Pearson's coefficient | Mean % Bias |
|----------------|-----------------|------------|--------------------------|-----------------------------|-----------------------|-------------|
| Site 1         | 47              | Analyzer 2 | 0.995<br>(0.972 – 1.015) | -0.857<br>(-2.751 – 1.154)  | 0.997                 | -1.057      |
| Site 2         | 48              | Analyzer 2 | 0.997<br>(0.978 – 1.020) | 0.200<br>(-2.349 – 2.289)   | 0.998                 | -0.121      |
| Site 3         | 39              | Analyzer 2 | 1.064<br>(0.970 – 1.105) | -7.902<br>(-12.417 – 1.805) | 0.997                 | 1.160       |
| Pooled (n=133) |                 |            | 1.017<br>(0.986 – 1.050) | -2.856<br>(-6.932 – 0.676)  | 0.997                 | -0.251      |

**Table S17.** Total percent (%) CV and components of variance between lots and within lots based on site and analyte for electrolytes.

| Analyte (Unit) | Variance Component | Mean % CV |        |        |
|----------------|--------------------|-----------|--------|--------|
|                |                    | Site 1    | Site 2 | Site 3 |
| K (mmol/L)     | Between Lot        | 0.00 *    | 0.64   | 0.25   |
|                | Within Lot         | 4.23      | 1.93   | 1.83   |

|                |                       |                    |                    |                    |
|----------------|-----------------------|--------------------|--------------------|--------------------|
| Na<br>(mmol/L) | Total                 | 4.23               | 2.03               | 1.84               |
|                | Mean<br>(sample size) | 4.47<br>(n = 56)   | 4.71<br>(n = 55)   | 4.41<br>(n = 60)   |
|                | Between Lot           | 0.42               | 0.00 *             | 0.00 *             |
|                | Within Lot            | 0.65               | 0.66               | 0.76               |
|                | Total                 | 0.77               | 0.66               | 0.76               |
| Cl<br>(mmol/L) | Mean<br>(sample size) | 138.80<br>(n = 56) | 139.04<br>(n = 55) | 136.37<br>(n = 60) |
|                | Between Lot           | 0.56               | 0.00 *             | 0.00 *             |
|                | Within Lot            | 0.94               | 0.60               | 0.73               |
|                | Total                 | 1.09               | 0.60               | 0.73               |
|                | Mean<br>(sample size) | 104.21<br>(n = 56) | 105.00<br>(n = 55) | 103.38<br>(n = 60) |
| Ca<br>(mg/dL)  | Between Lot           | 0.24               | 0.00 *             | 0.37               |
|                | Within Lot            | 0.94               | 0.85               | 0.91               |
|                | Total                 | 0.97               | 0.85               | 0.98               |
|                | Mean<br>(sample size) | 8.37<br>(n = 53)   | 8.58<br>(n = 51)   | 8.70<br>(n = 62)   |
|                |                       |                    |                    |                    |

**Table S18.** Total percent (%) CV and components of variance between lots and within lots based on site and analyte for liver function tests.

| Analyte<br>(Unit) | Variance<br>Component | Mean % CV |        |        |
|-------------------|-----------------------|-----------|--------|--------|
|                   |                       | Site 1    | Site 2 | Site 3 |
| AST<br>(U/L)      | Between Lot           | 3.94      | 2.12   | 1.03   |
|                   | Within Lot            | 4.77      | 9.00   | 2.97   |
|                   | Total                 | 6.19      | 9.25   | 3.15   |

|                               |                       |                   |                   |                   |
|-------------------------------|-----------------------|-------------------|-------------------|-------------------|
|                               | Mean<br>(sample size) | 17.75<br>(n = 56) | 20.05<br>(n = 55) | 21.87<br>(n = 62) |
| ALT<br>(U/L)                  | Between Lot           | 1.41              | 0.00 *            | 1.94              |
|                               | Within Lot            | 6.35              | 5.30              | 7.49              |
|                               | Total                 | 6.50              | 5.30              | 7.73              |
|                               | Mean<br>(sample size) | 11.59<br>(n = 56) | 12.49<br>(n = 55) | 16.20<br>(n = 61) |
| ALP<br>(U/L)                  | Between Lot           | 0.37              | 0.00 *            | 0.75              |
|                               | Within Lot            | 1.64              | 2.09              | 1.50              |
|                               | Total                 | 1.69              | 2.09              | 1.68              |
|                               | Mean<br>(sample size) | 86.34<br>(n = 56) | 70.93<br>(n = 56) | 68.81<br>(n = 62) |
| Total<br>Bilirubin<br>(mg/dL) | Between Lot           | 2.10              | 0.00 *            | 0.22              |
|                               | Within Lot            | 4.71              | 3.68              | 3.92              |
|                               | Total                 | 5.16              | 3.68              | 3.93              |
|                               | Mean<br>(sample size) | 0.30<br>(n = 53)  | 0.35<br>(n = 50)  | 0.31<br>(n = 60)  |
| Albumin<br>(mg/dL)            | Between Lot           | 0.61              | 0.38              | 1.11              |
|                               | Within Lot            | 2.34              | 2.15              | 1.81              |
|                               | Total                 | 2.42              | 2.19              | 2.12              |
|                               | Mean<br>(sample size) | 4.01<br>(n = 56)  | 3.88<br>(n = 52)  | 4.16<br>(n = 62)  |
| Total<br>Protein<br>(mg/dL)   | Between Lot           | 0.81              | 0.00 *            | 0.81              |
|                               | Within Lot            | 1.80              | 1.14              | 1.42              |
|                               | Total                 | 1.97              | 1.14              | 1.63              |
|                               | Mean (n)              | 6.74 (n = 56)     | 6.50 (n = 51)     | 6.75 (n = 62)     |

**Table S19.** Total percent (%) CV and components of variance between lots and within lots based

on site and analyte for kidney function tests.

| Analyte<br>(Unit)     | Variance<br>Component | Mean % CV         |                   |                   |
|-----------------------|-----------------------|-------------------|-------------------|-------------------|
|                       |                       | Site 1            | Site 2            | Site 3            |
| BUN<br>(mg/dL)        | Between Lot           | 0.00 *            | 0.13              | 0.00 *            |
|                       | Within Lot            | 2.94              | 2.04              | 2.60              |
|                       | Total                 | 2.94              | 2.04              | 2.60              |
|                       | Mean<br>(sample size) | 11.56<br>(n = 55) | 17.04<br>(n = 51) | 13.01<br>(n = 62) |
| Creatinine<br>(mg/dL) | Between Lot           | 0.17              | 0.00 *            | 0.79              |
|                       | Within Lot            | 2.79              | 2.64              | 2.76              |
|                       | Total                 | 2.79              | 2.64              | 2.87              |
|                       | Mean<br>(sample size) | 0.82<br>(n = 55)  | 0.83<br>(n = 50)  | 0.69<br>(n = 60)  |

**Table S20.** Total percent (%) CV and components of variance between lots and within lots based on site and analyte for lipid tests.

| Analyte<br>(Unit)            | Variance<br>Component | Mean % CV       |                 |                 |
|------------------------------|-----------------------|-----------------|-----------------|-----------------|
|                              |                       | Site 1          | Site 2          | Site 3          |
| Cholesterol<br>(mg/dL)       | Between Lot           | 0.46            | 0.10            | 0.79            |
|                              | Within Lot            | 2.03            | 1.85            | 1.59            |
|                              | Total                 | 2.98            | 1.85            | 1.77            |
|                              | Mean<br>(sample size) | 151.80 (n = 56) | 149.83 (n = 52) | 185.19 (n = 62) |
| Triglyceride<br>s<br>(mg/dL) | Between Lot           | 0.00 *          | 0.00 *          | 0.00 *          |
|                              | Within Lot            | 1.44            | 1.83            | 2.77            |
|                              | Total                 | 1.44            | 1.83            | 2.77            |

|                       |                 |                 |                 |
|-----------------------|-----------------|-----------------|-----------------|
| Mean<br>(sample size) | 137.80 (n = 56) | 108.92 (n = 52) | 141.05 (n = 62) |
|-----------------------|-----------------|-----------------|-----------------|

**Table S21.** Total percent (%) CV and components of variance between operators and within operators based on site and analyte for electrolytes.

| Analyte<br>(Unit) | Variance<br>Component | Mean % CV          |                    |                    |
|-------------------|-----------------------|--------------------|--------------------|--------------------|
|                   |                       | Site 1             | Site 2             | Site 3             |
| K<br>(mmol/L)     | Between Operator      | 1.48               | 0.00 *             | 0.39               |
|                   | Within Operator       | 4.14               | 2.08               | 1.48               |
|                   | Total                 | 4.39               | 2.08               | 1.54               |
|                   | Mean<br>(sample size) | 4.38<br>(n = 60)   | 4.70<br>(n = 60)   | 4.50<br>(n = 63)   |
| Na<br>(mmol/L)    | Between Operator      | 0.00 *             | 0.17               | 0.00 *             |
|                   | Within Operator       | 0.66               | 0.75               | 0.59               |
|                   | Total                 | 0.66               | 0.77               | 0.59               |
|                   | Mean<br>(sample size) | 137.87<br>(n = 60) | 139.28<br>(n = 60) | 136.73<br>(n = 63) |
| Cl<br>(mmol/L)    | Between Operator      | 0.06               | 0.21               | 0.00 *             |
|                   | Within Operator       | 0.82               | 0.83               | 0.97               |
|                   | Total                 | 0.82               | 0.86               | 0.97               |
|                   | Mean<br>(sample size) | 103.15<br>(n = 60) | 104.97<br>(n = 60) | 103.95<br>(n = 63) |
| Ca<br>(mg/dL)     | Between Operator      | 0.17               | 0.00 *             | 0.23               |
|                   | Within Operator       | 0.94               | 2.70               | 1.01               |
|                   | Total                 | 0.95               | 2.70               | 1.03               |
|                   | Mean<br>(sample size) | 8.31<br>(n = 56)   | 8.52<br>(n = 51)   | 8.64<br>(n = 65)   |

**Table S22.** Total percent (%) CV and components of variance between operators and within operators based on site and analyte for liver function tests.

| Analyte<br>(Unit)             | Variance<br>Component | Mean % CV         |                   |                   |
|-------------------------------|-----------------------|-------------------|-------------------|-------------------|
|                               |                       | Site 1            | Site 2            | Site 3            |
| AST<br>(U/L)                  | Between Operator      | 2.27              | 1.57              | 1.81              |
|                               | Within Operator       | 7.29              | 8.16              | 2.72              |
|                               | Total                 | 7.63              | 8.31              | 3.26              |
|                               | Mean<br>(sample size) | 18.02<br>(n = 60) | 20.05<br>(n = 60) | 21.61<br>(n = 66) |
| ALT<br>(U/L)                  | Between Operator      | 2.74              | 0.00 *            | 0.00 *            |
|                               | Within Operator       | 5.48              | 4.21              | 7.27              |
|                               | Total                 | 6.13              | 4.21              | 7.27              |
|                               | Mean<br>(sample size) | 11.82<br>(n = 60) | 12.73<br>(n = 60) | 15.50<br>(n = 64) |
| ALP<br>(U/L)                  | Between Operator      | 0.82              | 0.15              | 0.94              |
|                               | Within Operator       | 1.50              | 1.24              | 1.65              |
|                               | Total                 | 1.71              | 1.25              | 1.90              |
|                               | Mean<br>(sample size) | 86.22<br>(n = 60) | 72.13<br>(n = 60) | 68.14<br>(n = 66) |
| Total<br>Bilirubin<br>(mg/dL) | Between Operator      | 0.75              | 0.00 *            | 0.76              |
|                               | Within Operator       | 5.20              | 4.09              | 3.14              |
|                               | Total                 | 5.25              | 4.09              | 3.23              |
|                               | Mean<br>(sample size) | 0.29<br>(n = 57)  | 0.35<br>(n = 51)  | 0.31<br>(n = 62)  |
| Albumin<br>(mg/dL)            | Between Operator      | 0.73              | 0.42              | 0.91              |
|                               | Within Operator       | 2.13              | 1.68              | 1.78              |
|                               | Total                 | 2.25              | 1.73              | 2.00              |



|                         |                       |                  |                  |                  |
|-------------------------|-----------------------|------------------|------------------|------------------|
| Total Protein<br>(g/dL) | Mean<br>(sample size) | 4.00<br>(n = 60) | 3.89<br>(n = 54) | 4.11<br>(n = 66) |
|                         | Between Operator      | 1.08             | 0.31             | 0.77             |
|                         | Within Operator       | 1.71             | 1.22             | 1.42             |
|                         | Total                 | 2.02             | 1.26             | 1.62             |
|                         | Mean<br>(sample size) | 6.78<br>(n = 60) | 6.51<br>(n = 54) | 6.70<br>(n = 65) |

**Table S23.** Total percent (%) CV and components of variance between operators and within operators based on site and analyte for kidney function tests.

| Analyte<br>(Unit)     | Variance<br>Component | Mean % CV         |                   |                   |
|-----------------------|-----------------------|-------------------|-------------------|-------------------|
|                       |                       | Site 1            | Site 2            | Site 3            |
| BUN<br>(mg/dL)        | Between Operator      | 0.00 *            | 0.34              | 0.40              |
|                       | Within Operator       | 2.35              | 1.58              | 2.72              |
|                       | Total                 | 2.35              | 1.61              | 2.75              |
|                       | Mean<br>(sample size) | 11.85<br>(n = 60) | 16.96<br>(n = 54) | 13.15<br>(n = 65) |
| Creatinine<br>(mg/dL) | Between Operator      | 0.00 *            | 0.00 *            | 0.41              |
|                       | Within Operator       | 3.16              | 2.47              | 2.72              |
|                       | Total                 | 3.16              | 2.47              | 2.75              |
|                       | Mean<br>(sample size) | 0.81<br>(n = 59)  | 0.83<br>(n = 54)  | 0.68<br>(n = 62)  |

**Table S24.** Total percent (%) CV and components of variance between operators and within operators based on site and analyte for lipid tests.

| Analyte<br>(Unit) | Variance<br>Component | Mean % CV |        |        |
|-------------------|-----------------------|-----------|--------|--------|
|                   |                       | Site 1    | Site 2 | Site 3 |

|                              |                    |                 |                 |                 |
|------------------------------|--------------------|-----------------|-----------------|-----------------|
| Cholesterol<br>(mg/dL)       | Between Operator   | 0.93            | 0.00 *          | 0.97            |
|                              | Within Operator    | 1.89            | 1.25            | 1.57            |
|                              | Total              | 2.11            | 1.25            | 1.85            |
|                              | Mean (sample size) | 152.33 (n = 60) | 149.17 (n = 54) | 185.36 (n = 66) |
| Triglyceride<br>s<br>(mg/dL) | Between Operator   | 0.36            | 0.00 *          | 0.12            |
|                              | Within Operator    | 1.30            | 1.57            | 2.58            |
|                              | Total              | 1.35            | 1.57            | 2.58            |
|                              | Mean (sample size) | 137.28 (n = 60) | 109.17 (n = 54) | 137.91 (n = 66) |

### ***Sample Contriving Method Validation Study***

In the performance comparison study and precision study, select samples were modified in order to achieve extreme values for analytes' concentration. Briefly, blood samples from a single subject are collected into 10mL lithium heparin BCTs (Blood Collection Tubes) and transferred to a sterile 50mL conical tube. The blood samples are slightly diluted to modify the analyte concentration, and then drawn into lithium heparin ZDiscs or PSTs by butterfly tubing, similar to conventional blood draw as shown in the Supplementary Figure S1.

In order to validate the sample contriving method, analytes' concentrations in the double-heparinized blood samples, which were drawn from the test apparatus as shown in Figure S1, were compared to directly drawn whole blood for both ZDiscs and PSTs.

Blood samples were collected from 10 subjects. Each subject had blood directly drawn into one ZDisc as well as one PST (i.e. direct draw group) and two 10 mL Li-Heparin PSTs. The blood in Li-Heparin tubes were subject to the contriving method: blood samples were drawn into one ZDisc

and one PST (i.e. contrived group). No dilution was performed here in order to compare analyte concentration in the double-heparinized group (i.e. contrived group) vs the direct draw group. Blood samples in ZDiscs were separated using the ZDrive while samples in the PSTs were separated using a conventional centrifuge and tested for the concentration of analytes. Analyte concentration in plasma from both ZDisc and PST were measured using a chemistry analyzer, Piccolo Xpress Chemistry Analyzer (Abaxis, Union City, CA, USA). Note that 12 analytes excluding lipid analytes (i.e. cholesterol and triglycerides) were assessed in this study due to the limitation in the panel configuration of the chemistry analyzer.

Table S25 shows the grand mean and SD of analyte concentration across ZDiscs and PSTs, and mean % differences between the direct draw vs the contrived method for both ZDisc and PST. Notably, several analytes (Creatinine, ALT) showed the mean % difference close to or greater than 5%. Mean % difference between the direct draw vs the contrived method for creatinine was -12.37% for ZDisc and 9.76% for PST, however the paired t-test showed that the difference is not significant (p-value: 0.14 for ZDisc and 0.38 for PST). Similarly, mean % difference between the direct draw vs the contrived method for ALT is 4.39% and 8.99% for ZDisc and PST, respectively, but no significance determined in the paired t-test (p-value: 0.87 for ZDisc and 0.11 for PST). All other analytes showed less than 5% in the mean % difference for the direct draw and the contrived method.

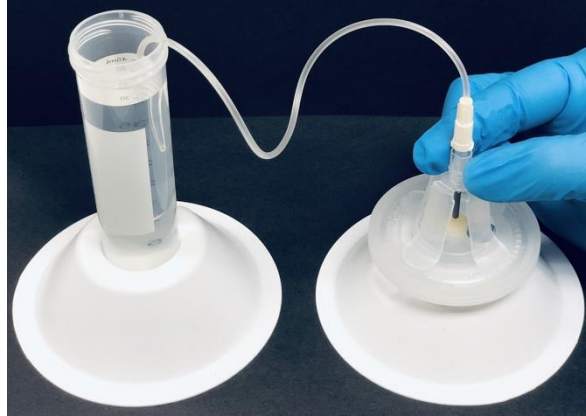

**Figure S1.** Modified blood collection set including 21G butterfly 12-inch tubing to transfer the modified samples in a 50mL conical tube into a ZDisc.

**Table S25.** Grand mean with SD and mean % difference between the direct draw group vs the contrived group for each analyte

|                                                                |                                    | K               | Na               | Cl               | Ca              | BUN             | Cre              |
|----------------------------------------------------------------|------------------------------------|-----------------|------------------|------------------|-----------------|-----------------|------------------|
| <b>Total Mean<br/>(± SD)</b>                                   |                                    | 4.08 ±<br>0.26  | 141.48 ±<br>1.99 | 103.35 ±<br>1.96 | 2.39 ±<br>0.09  | 5.20 ±<br>1.37  | 78.80 ±<br>18.25 |
| <b>Mean condition<br/>analyte<br/>concentration (±<br/>SD)</b> | <b>ZDisc<br/>(Contrived)</b>       | 4.1±0.2         | 141.4±2.0        | 103.2±1.8        | 2.4±0.1         | 5.2±1.4         | 72.5±20.9        |
|                                                                | <b>ZDisc<br/>(Direct<br/>draw)</b> | 4.2±0.4         | 142.1±2.1        | 103.4±2.3        | 2.4±0.1         | 5.2±1.4         | 84.4±16.9        |
|                                                                | <b>PST<br/>(Contrived)</b>         | 4.0±0.2         | 141.2±2.3        | 103.6±2.0        | 2.4±0.1         | 5.2±1.4         | 81.8±18.3        |
|                                                                | <b>PST (Direct<br/>draw)</b>       | 4.0±0.2         | 141.2±1.5        | 103.2±1.9        | 2.4±0.1         | 5.2±1.4         | 76.5±17.1        |
| <b>Mean % difference</b>                                       | <b>ZDisc</b>                       | -3.08           | -0.49            | -0.17            | 1.09            | -0.02           | -12.37           |
|                                                                | <b>PST</b>                         | -0.37           | 0.00             | 0.40             | 0.74            | 0.95            | 9.76             |
|                                                                |                                    | AST             | ALT              | ALP              | T.Bili          | Alb             | TP               |
| <b>Total Mean<br/>(± SD)</b>                                   |                                    | 30.38 ±<br>6.13 | 33.13 ±<br>15.20 | 62.48 ±<br>7.47  | 17.35 ±<br>3.75 | 41.20 ±<br>3.34 | 75.00 ±<br>7.05  |
| <b>Mean condition<br/>analyte concentration<br/>(± SD)</b>     | <b>ZDisc<br/>(Contrived)</b>       | 31±6.6          | 33.1±15.5        | 63.4±7.0         | 17.2±3.9        | 41.7±3.1        | 75.3±7.4         |
|                                                                | <b>ZDisc<br/>(Direct<br/>draw)</b> | 30.2±6.6        | 32.9±17.0        | 61.9±8.9         | 17.4±3.8        | 40.5±3.7        | 75.4±7.9         |

|                          |                              |          |           |          |          |          |          |
|--------------------------|------------------------------|----------|-----------|----------|----------|----------|----------|
|                          | <b>PST<br/>(Contrived)</b>   | 30.7±5.9 | 34.4±15.5 | 62.2±6.8 | 17.5±4.0 | 42.1±3.3 | 75.1±6.4 |
|                          | <b>PST (Direct<br/>draw)</b> | 29.6±6.3 | 32.1±15.1 | 62.4±8.1 | 17.3±3.9 | 40.5±3.3 | 74.2±7.5 |
| <b>Mean % difference</b> | <b>ZDisc</b>                 | 3.05     | 4.39      | 1.75     | -1.21    | 3.15     | 0.00     |
|                          | <b>PST</b>                   | 4.25     | 8.99      | 0.91     | 1.04     | 4.04     | 1.40     |

### *Lowest Quartile Performance Comparison Analysis*

In order to assess whether use of the ZDisc might impact analytical limit of detection, as secondary analysis the bottom quartile of reference sample results was analyzed separately. Performance comparison fit and bias for this sub-set were generally comparable to those found for analysis of all samples for each of the 14 analytes.

**Table S26.** Mean percent bias for all analytes at each site and for each chemistry analyzer for the lowest quartile subgroup

| <b>Site/Analyzer</b>               |                        | <b>K</b>                   | <b>Na</b>      | <b>Cl</b>            | <b>Ca</b>  | <b>AST</b>        | <b>ALT</b>         | <b>ALP</b>           |
|------------------------------------|------------------------|----------------------------|----------------|----------------------|------------|-------------------|--------------------|----------------------|
| <b>Site 1</b>                      | <b>Analyzer 1</b>      | 1.279                      | 0.503          | 0.057                | 0.133      | -0.730            | 3.590              | 2.482                |
|                                    | <b>Analyzer 2</b>      | 0.042                      | -0.356         | -0.090               | -0.268     | -0.338            | 1.873              | -0.410               |
|                                    | <b>Analyzer Pooled</b> | 0.661                      | 0.073          | -0.017               | -0.067     | -0.534            | 2.726              | 1.036                |
| <b>Site 2</b>                      | <b>Analyzer 1</b>      | 0.043                      | -0.275         | -0.472               | 0.436      | -0.110            | 0.071              | 1.209                |
|                                    | <b>Analyzer 2</b>      | -0.648                     | 0.265          | 0.498                | 0.559      | -2.765            | 1.382              | 1.537                |
|                                    | <b>Analyzer Pooled</b> | -0.685                     | -0.005         | 0.431                | -0.144     | -4.124            | 1.037              | 3.032                |
| <b>Site 3</b>                      | <b>Analyzer 1</b>      | 0.066                      | 0.094          | 0.133                | 0.178      | -0.449            | -0.201             | -0.202               |
|                                    | <b>Analyzer 2</b>      | -1.934                     | 0.181          | 0.461                | 0.559      | -2.192            | -5.221             | 0.076                |
|                                    | <b>Analyzer Pooled</b> | -2.672                     | 0.137          | 0.365                | -0.144     | -3.125            | -2.034             | 0.366                |
| <b>3 sites pooled / Analyzer 1</b> |                        | -1.193                     | 0.109          | 0.198                | 0.603      | -2.848            | 1.618              | 2.392                |
| <b>3 sites pooled / Analyzer 2</b> |                        | -0.930                     | 0.015          | 0.226                | -0.107     | -1.471            | -1.387             | 0.420                |
| <b>Total</b>                       |                        | -1.062                     | 0.062          | 0.212                | 0.248      | -2.159            | 0.116              | 1.406                |
| <b>Site/Analyzer</b>               |                        | <b>Total<br/>Bilirubin</b> | <b>Albumin</b> | <b>Total Protein</b> | <b>BUN</b> | <b>Creatinine</b> | <b>Cholesterol</b> | <b>Triglycerides</b> |
| <b>Analyzer 1</b>                  |                        | 0.000                      | 1.559          | 0.899                | 1.111      | 0.077             | N/A                | N/A                  |
| <b>Analyzer 2</b>                  |                        | 7.043                      | 1.329          | 1.318                | 0.256      | 2.161             | -0.938             | -0.026               |
| <b>Analyzer Pooled</b>             |                        | 3.522                      | 1.444          | 1.109                | 0.683      | 1.119             | -0.938             | -0.026               |
| <b>Analyzer 1</b>                  |                        | 0.000                      | 3.428          | 0.913                | -2.872     | -0.255            | N/A                | N/A                  |
| <b>Analyzer 2</b>                  |                        | -0.170                     | 1.717          | -0.529               | 0.000      | 2.534             | 0.221              | -0.675               |
| <b>Analyzer Pooled</b>             |                        | -0.085                     | 2.573          | 0.192                | -1.436     | 1.140             | 0.221              | -0.675               |
| <b>Analyzer 1</b>                  |                        | 0.000                      | 0.412          | 0.606                | 0.386      | -0.282            | N/A                | N/A                  |
| <b>Analyzer 2</b>                  |                        | -3.756                     | 1.969          | 0.863                | 0.980      | 2.277             | -0.709             | 0.883                |
| <b>Analyzer Pooled</b>             |                        | -1.878                     | 1.190          | 0.735                | 0.683      | 0.997             | -0.709             | 0.883                |

|                             |       |       |       |        |        |        |       |
|-----------------------------|-------|-------|-------|--------|--------|--------|-------|
| 3 sites pooled / Analyzer 1 | 0.000 | 2.143 | 0.862 | -0.316 | -0.102 | N/A    | N/A   |
| 3 sites pooled / Analyzer 2 | 0.401 | 1.610 | 0.298 | 0.436  | 2.279  | -0.412 | 0.131 |
| Total                       | 0.200 | 1.877 | 0.580 | 0.060  | 1.088  | -0.412 | 0.131 |

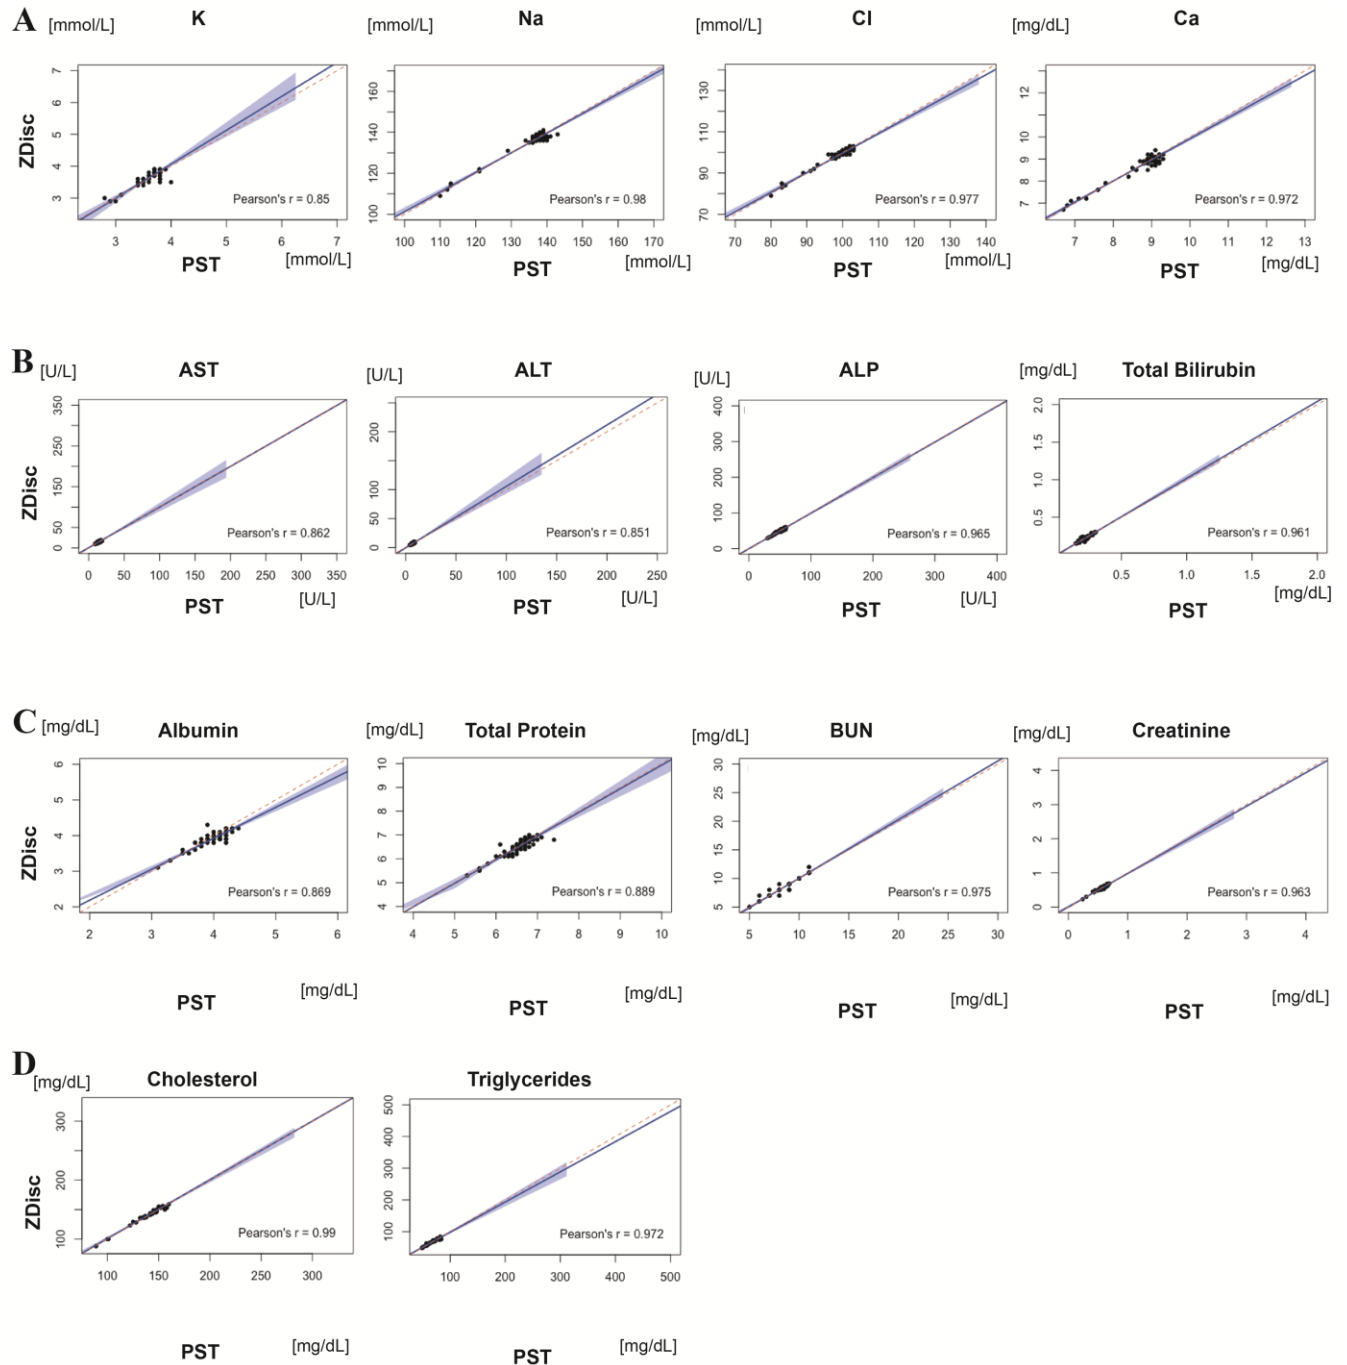

**Figure S2.** Scatter plots of the lowest quartile subgroup representing all 14 analytes results for ZDisc vs. vacutainer PST with Deming regression line with 95% CI (blue), reference interval for each analyte (orange), and identity line (red dots) across all sites and analyzers (A thru D); Bland-Altman plots with mean (red solid line) and  $\pm 2$ SD (red dotted line) (E thru H).

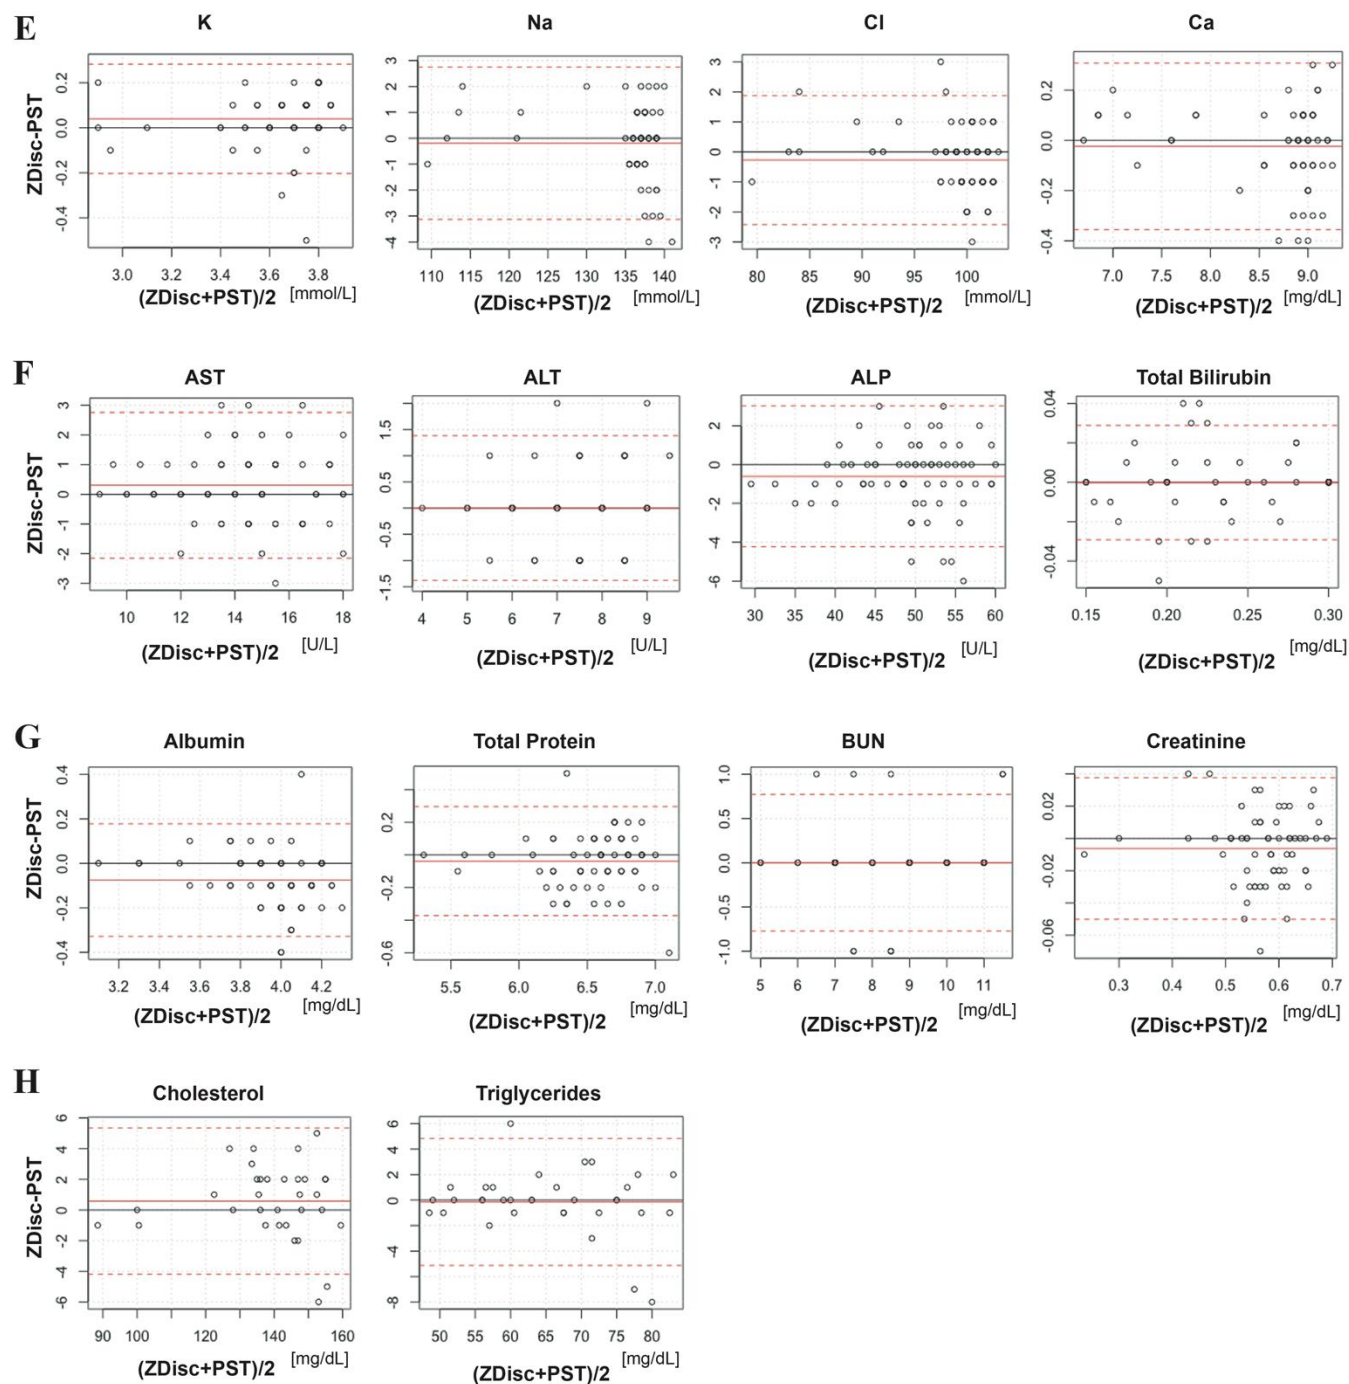

**Figure S2.** (continued) Scatter plots of the lowest quartile subgroup representing all 14 analytes results for ZDisc vs. vacutainer PST with Deming regression line with 95% CI (blue), reference interval for each analyte (orange), and identity line (red dots) across all sites and analyzers (A thru D); Bland-Altman plots with mean (red solid line) and  $\pm 2$ SD (red dotted line) (E thru H).
